# Supplementary material
Source: publisher figshare collection journal article supplement (https://acs.figshare.com/ndownloader/files/24580593)
Supplement: Supplementary file 1 [file 24580593]

## Supporting Information

### Effect of methanol on desupersaturation of IMC

The desupersaturation kinetics of supersaturated solutions of IMC at 25 °C by crystallization onto seed crystals was measured at pH 2.0 and initial supersaturation of 6. Supersaturation was induced by adding either 0.55 mL of 1 mg/mL or 0.17 mL of 3.3 mg/mL solution of IMC in methanol into 100 mL of aqueous medium that was pre-equilibrated with IMC at pH 2.0. Aliquots were withdrawn at intervals over 2 hours filtered through 0.22  $\mu$ m regenerated cellulose filters (Corning Inc., Corning, NY), diluted and analyzed for concentration of IMC using HPLC. The data is summarized in Table 1. At  $\alpha$  level of 0.05, there is no difference in desupersaturation kinetics of IMC at pH 2.0 from  $\sigma_0$  of 6 with different organic solvent content.

**Table 1-** The time to a supersaturation level of 1.2 starting from an initial supersaturation level of 6 at pH 2.0, with different organic solvent content.

| <b>Methanol added to 100 mL aqueous solution</b> | <b>Time (min) from initial supersaturation, <math>\sigma_0=6</math>, to <math>\sigma=1.2</math></b> | <b>Rate constant for integration of HA into the crystal, <math>k'_i</math> (L/mol sec)</b> |
|--------------------------------------------------|-----------------------------------------------------------------------------------------------------|--------------------------------------------------------------------------------------------|
| 0.55 mL                                          | $24 \pm 2$                                                                                          | $158 \pm 10$                                                                               |
| 0.17 mL                                          | $23 \pm 2$                                                                                          | $167 \pm 5$                                                                                |

### Effect of methanol on solubility of IMC

The effect of methanol on solubility of IMC was determined by measuring the solubility of  $\gamma$ -IMC in 0.01N HCl at pH 2.0 and 0.01N HCl containing 0.5%v/v of methanol. An excess ( $\approx 0.5$  mg/mL) of  $\gamma$ -IMC powder was added to 50 mL of media in a glass vial at 25°C on a magnetic stirring plate with digital temperature reading (Isotemp; Fisher Scientific, Agawam, Massachusetts) for 2 hours; temperatures of the suspensions were confirmed by manually reading a thermometer. Samples were withdrawn at 1 hour and 2 hours, filtered through 0.22  $\mu$ m regenerated cellulose filters (Corning Inc., Corning, NY), diluted and analyzed by HPLC. There is no statistical difference ( $\alpha = 0.05$ ) in the solubility in 0.01N HCl at pH 2.0 and 0.01N HCl containing 0.5%v/v of methanol (Table 2).

**Table 2-** Effect of methanol on solubility of indomethacin.

| Media                              | Solubility (M) |
|------------------------------------|----------------|
| 0.01 N HCl                         | $2.8 \pm 0.10$ |
| 0.01 N HCl with 0.05% v/v methanol | $2.8 \pm 0.09$ |
